# Supplementary material
Source: PubMed Central journal article supplement (PMC4913863)
Supplement: NIHMS54580-supplement-Supplementary_Methods.pdf [file NIHMS54580-supplement-Supplementary_Methods.pdf]

## Supplementary Method 1: Power calculation for survival analysis in SGCTG cohort

We estimated the average power of the analysis in SGCTG cohort using the formula 1 and 2 described before (1, 2).

$$N = \frac{(\mu_{1-\alpha/2} + \mu_{1-\beta})^2}{(\log \theta)^2 \phi(1-p)p} \quad (1)$$

$$FDR = \frac{\pi_0 \alpha}{\pi_0 \alpha + (1 - \pi_0)(1 - \beta)} \quad (2)$$

Here,  $\mu_\gamma$  indicates the  $\gamma$ -quantile of the standard normal distribution;  $\theta$  is the hazard ratio;  $\phi$  is the probability of an uncensored observation;  $p$  is the methylation frequency of loci in ovarian cancer;  $\pi_0$  is the proportion of true null hypotheses;  $\alpha$  is the significant level and  $1-\beta$  is the average power expected on the microarray.

| power<br>( $\beta$ ) | FDR  | true positive<br>( $1-\pi_0$ ) | significant<br>level ( $\alpha$ ) | uncensored ( $\phi$ ) | hazard<br>ratio ( $\theta$ ) | methylation<br>frequency ( $p$ ) | Sample size (N) |
|----------------------|------|--------------------------------|-----------------------------------|-----------------------|------------------------------|----------------------------------|-----------------|
| 0.75                 | 0.10 | 0.05                           | 0.0044                            | 0.9                   | 2                            | 0.25                             | 150             |
| 0.83                 | 0.10 | 0.1                            | 0.0102                            | 0.9                   | 2                            | 0.25                             | 150             |
| 0.89                 | 0.10 | 0.05                           | 0.0052                            | 0.9                   | 2                            | 0.50                             | 150             |
| 0.93                 | 0.10 | 0.1                            | 0.0115                            | 0.9                   | 2                            | 0.50                             | 150             |

### Reference

1. Schmoor C, Sauerbrei W, Schumacher M. Sample size considerations for the evaluation of prognostic factors in survival analysis. *Stat Med* 2000;19: 441-52.
2. Tong T, Zhao H. Practical guidelines for assessing power and false discovery rate for a fixed sample size in microarray experiments. *Stat Med* 2008;27: 1960-72.

## **Supplementary Method 2: Logistic regression analysis**

### Construction of response model using forward stepwise likelihood ratio algorithm

The methylation of *VEGFB*, *PRM2*, *CD82*, *TR2IT1*, *GPX4*, *RAD54L* and *EME2* was used as categorical variables in the multivariate logistic regression model construction. 20% of the patients with highest methylation were defined as the ‘high methylation group’. Otherwise they were in the ‘low methylation group’. Forward stepwise likelihood ratio algorithm was used in the model construction, where the variables with significance level less than 0.05 to enter the model, and with significance level larger than 0.1 to be removed from the model. The variables included and excluded from the model were shown in M2.Table 1 and M2.Table 2 below, respectively. Only methylation of *VEGFB* and *GPX4* were included in the final model.

### Validation of the biomarkers associated with response in TCGA cohort

The patients collected by TCGA study were used as the validation cohort for the association between response and methylation of *VEGFB* and *GPX4* identified from SGCTG cohort. As shown in M2.Table 4, batch effect was a confounding factor in the response analysis, especially in a group of the patients from batch 14. Therefore, the patients in batch 14 were excluded in the analysis. In the following logistic regression analysis in TCGA cohort, methylation was used a categorical variable. The patients with higher methylation (top 20% of patients) of *VEGFB* (cg05492845, chr11: 63758874-63758875) or *GPX4* (cg17812013, chr19: 1055136-1055137) were categorised as ‘poor response group’. This group of patients was more likely to have poor response to chemotherapy in this cohort (OR: 2.06, 95% CI 0.96-4.42, p=0.064). After adjusted batch effect in the model, this trend became clearer (adjusted OR: 4.24, 95% CI 1.21-14.84, p=0.024).

**M2.Table 1: Variables in the multivariate logistic regression model**

|                                | B     | S.E. | Wald  | df | Sig. | Exp(B) | 95% CI. for EXP(B) |        |
|--------------------------------|-------|------|-------|----|------|--------|--------------------|--------|
|                                |       |      |       |    |      |        | Lower              | Upper  |
| Step 1 <sup>a</sup>            |       |      |       |    |      |        |                    |        |
| VEGFB group (high methylation) | 1.779 | .593 | 8.989 | 1  | .003 | 5.921  | 1.851              | 18.937 |
| Constant                       | -.274 | .215 | 1.626 | 1  | .202 | .760   |                    |        |
| Step 2 <sup>b</sup>            |       |      |       |    |      |        |                    |        |
| VEGFB group (high methylation) | 1.644 | .608 | 7.319 | 1  | .007 | 5.176  | 1.573              | 17.035 |
| GPX4 group (high methylation)  | 1.387 | .569 | 5.935 | 1  | .015 | 4.001  | 1.311              | 12.210 |
| Constant                       | -.509 | .239 | 4.538 | 1  | .033 | .601   |                    |        |

a. Variable(s) entered on step 1: VEGFB group.

b. Variable(s) entered on step 2: GPX4 group.

**M2: Table 2: Variables not in the multivariate logistic regression model**

|        |                    |              | Score  | df | Sig. |
|--------|--------------------|--------------|--------|----|------|
| Step 1 | Variables          | RRM2 group   | 3.712  | 1  | .054 |
|        |                    | CD82 group   | 2.643  | 1  | .104 |
|        |                    | TR2IT1 group | .648   | 1  | .421 |
|        |                    | GPX4 group   | 6.502  | 1  | .011 |
|        |                    | RAD54L group | 3.399  | 1  | .065 |
|        |                    | EME2 group   | 4.500  | 1  | .034 |
|        | Overall Statistics |              | 12.815 | 6  | .046 |
| Step 2 | Variables          | RRM2 group   | 1.696  | 1  | .193 |
|        |                    | CD82 group   | 1.973  | 1  | .160 |
|        |                    | TR2IT1 group | .003   | 1  | .960 |
|        |                    | RAD54L group | 1.796  | 1  | .180 |
|        |                    | EME2 group   | 2.288  | 1  | .130 |
|        | Overall Statistics |              | 7.042  | 5  | .218 |

**M2.Table 3: Classification Table<sup>a</sup>**

| Observed |          |               | Predicted from multivariate model |               |                    |
|----------|----------|---------------|-----------------------------------|---------------|--------------------|
|          |          |               | Response                          |               | Percentage Correct |
|          |          |               | Good response                     | Poor response |                    |
| Step 1   | response | Good response | 50                                | 4             | 92.6               |
|          |          | Poor response | 38                                | 18            | 32.1               |
|          |          | Percentage    | 56.8                              | 81.8          | 61.8               |
| Step 2   | response | Good response | 46                                | 8             | 85.2               |
|          |          | Poor response | 27                                | 29            | 51.8               |
|          |          | Percentage    | 63.0                              | 78.3          | 68.2               |

a. The cut value is .500

**M2.Table 4: batch effect in the logistic regression analysis in TCGA cohort**

|                     |                  | B             | S.E.         | Wald         | df       | Sig.        | Exp(B)      | 95% CI.for EXP(B) |             |
|---------------------|------------------|---------------|--------------|--------------|----------|-------------|-------------|-------------------|-------------|
|                     |                  |               |              |              |          |             |             | Lower             | Upper       |
| Step 1 <sup>a</sup> | Batch            |               |              | 12.733       | 7        | .079        |             |                   |             |
|                     | batch(12)        | -.634         | .683         | .860         | 1        | .354        | .531        | .139              | 2.025       |
|                     | batch(13)        | -.411         | .646         | .404         | 1        | .525        | .663        | .187              | 2.352       |
|                     | <b>batch(14)</b> | <b>-2.325</b> | <b>1.099</b> | <b>4.478</b> | <b>1</b> | <b>.034</b> | <b>.098</b> | <b>.011</b>       | <b>.842</b> |
|                     | batch(15)        | -19.891       | 8770.825     | .000         | 1        | .998        | .000        | .000              | .           |
|                     | batch(17)        | -.154         | .622         | .061         | 1        | .804        | .857        | .253              | 2.899       |
|                     | batch(18)        | -.228         | .619         | .136         | 1        | .713        | .796        | .236              | 2.680       |
|                     | batch(19)        | .877          | .575         | 2.323        | 1        | .128        | 2.403       | .778              | 7.423       |
|                     | Constant         | -1.312        | .426         | 9.496        | 1        | .002        | .269        |                   |             |

a. Variable(s) entered on step 1: batch. Reference is batch 9
